# Supplementary material for: A novel unconventional T cell population enriched in Crohn’s disease
Source: Gut. 2022 Mar 9;71(11):2194–204. doi: 10.1136/gutjnl-2021-325373 (PMC9554086; doi:10.1136/gutjnl-2021-325373)
Supplement: Supplementary data [file gutjnl-2021-325373supp003.xlsx]

## Sheet: A_210421_CD_HLA_glm
summary reults of glm models for the association between abundance of CAIT cells and HLA genotype in CD patients
BETA	SE	Z	P	MAF	P_FDR
imputed_HLA_A*01	-0.0509178	0.318253	-0.159991	0.873214	0.133663	0.97331
imputed_HLA_A*01:01	-0.0509178	0.318253	-0.159991	0.873214	0.133663	0.97331
imputed_HLA_A*02	-0.415039	0.222322	-1.86684	0.064883	0.351485	0.697508
imputed_HLA_A*02:01	-0.457693	0.222797	-2.0543	0.0425813	0.331683	0.697508
imputed_HLA_A*02:05	0.460411	0.908614	0.506718	0.61348	0.0148515	0.856843
imputed_HLA_A*03	0.181324	0.302601	0.599217	0.550397	0.163366	0.822443
imputed_HLA_A*03:01	0.181324	0.302601	0.599217	0.550397	0.163366	0.822443
imputed_HLA_A*11	0.131154	0.446789	0.293547	0.769719	0.0693069	0.909667
imputed_HLA_A*11:01	0.131154	0.446789	0.293547	0.769719	0.0693069	0.909667
imputed_HLA_A*24	1.09095	0.399188	2.73293	0.00743589	0.0693069	0.418888
imputed_HLA_A*24:02	1.09095	0.399188	2.73293	0.00743589	0.0693069	0.418888
imputed_HLA_A*25	-1.26181	0.90091	-1.40059	0.164463	0.0148515	0.822443
imputed_HLA_A*25:01	-1.26181	0.90091	-1.40059	0.164463	0.0148515	0.822443
imputed_HLA_A*26	0.44515	0.606491	0.733976	0.464698	0.0346535	0.822443
imputed_HLA_A*26:01	0.44515	0.606491	0.733976	0.464698	0.0346535	0.822443
imputed_HLA_A*30	-0.384375	0.652255	-0.589301	0.557002	0.029703	0.822443
imputed_HLA_A*30:01	-0.495841	0.710278	-0.698094	0.486755	0.0247525	0.822443
imputed_HLA_A*31	-0.0189451	0.653396	-0.0289948	0.976927	0.029703	0.978968
imputed_HLA_A*31:01	-0.0189451	0.653396	-0.0289948	0.976927	0.029703	0.978968
imputed_HLA_A*32	-0.198503	0.571564	-0.347297	0.729105	0.039604	0.886466
imputed_HLA_A*32:01	-0.198503	0.571564	-0.347297	0.729105	0.039604	0.886466
imputed_HLA_A*68	0.389112	0.570573	0.681968	0.496852	0.039604	0.822443
imputed_HLA_A*68:01	0.524147	0.651271	0.804806	0.42286	0.029703	0.822443
imputed_HLA_B*07	-0.204803	0.367727	-0.556945	0.578822	0.113861	0.827485
imputed_HLA_B*07:02	-0.204803	0.367727	-0.556945	0.578822	0.113861	0.827485
imputed_HLA_B*08	-0.308766	0.385138	-0.801701	0.424646	0.0841584	0.822443
imputed_HLA_B*08:01	-0.308766	0.385138	-0.801701	0.424646	0.0841584	0.822443
imputed_HLA_B*13	0.450714	0.458984	0.981981	0.328503	0.0643564	0.822443
imputed_HLA_B*13:02	0.450714	0.458984	0.981981	0.328503	0.0643564	0.822443
imputed_HLA_B*15	-0.532561	0.383622	-1.38824	0.168179	0.0693069	0.822443
imputed_HLA_B*15:01	-0.478138	0.393565	-1.21489	0.227298	0.0643564	0.822443
imputed_HLA_B*18	0.83655	0.510244	1.63951	0.104281	0.049505	0.70016
imputed_HLA_B*18:01	0.83655	0.510244	1.63951	0.104281	0.049505	0.70016
imputed_HLA_B*27	-0.168156	0.434002	-0.387455	0.699251	0.0742574	0.868922
imputed_HLA_B*27:05	-0.201451	0.446525	-0.451153	0.652866	0.0693069	0.860685
imputed_HLA_B*35	0.687855	0.406981	1.69014	0.0941481	0.0841584	0.70016
imputed_HLA_B*35:01	0.269501	0.460418	0.585341	0.559651	0.0643564	0.822443
imputed_HLA_B*35:03	2.71294	0.867973	3.1256	0.00232895	0.0148515	0.393592
imputed_HLA_B*38	0.422637	0.652016	0.6482	0.518356	0.029703	0.822443
imputed_HLA_B*38:01	0.422637	0.652016	0.6482	0.518356	0.029703	0.822443
imputed_HLA_B*39	0.833568	0.905926	0.920128	0.359742	0.0148515	0.822443
imputed_HLA_B*39:01	0.833568	0.905926	0.920128	0.359742	0.0148515	0.822443
imputed_HLA_B*40	-0.123699	0.371635	-0.332851	0.73995	0.0940594	0.890425
imputed_HLA_B*40:01	-0.166958	0.413632	-0.403639	0.687349	0.0693069	0.860685
imputed_HLA_B*40:02	0.0403538	0.712013	0.0566757	0.954918	0.0247525	0.978968
imputed_HLA_B*44	-0.088943	0.35406	-0.251209	0.802173	0.108911	0.928543
imputed_HLA_B*44:02	-0.248674	0.385577	-0.644939	0.520458	0.0841584	0.822443
imputed_HLA_B*44:03	0.598497	0.907801	0.659282	0.511245	0.0148515	0.822443
imputed_HLA_B*49	-1.03481	0.645068	-1.60418	0.11186	0.029703	0.70016
imputed_HLA_B*49:01	-1.03481	0.645068	-1.60418	0.11186	0.029703	0.70016
imputed_HLA_B*51	-0.231125	0.476777	-0.484765	0.628914	0.0594059	0.860685
imputed_HLA_B*51:01	-0.231125	0.476777	-0.484765	0.628914	0.0594059	0.860685
imputed_HLA_B*52	0.589027	0.789738	0.745851	0.457524	0.019802	0.822443
imputed_HLA_B*52:01	0.589027	0.789738	0.745851	0.457524	0.019802	0.822443
imputed_HLA_B*57	-1.10374	0.56105	-1.96728	0.05195	0.039604	0.697508
imputed_HLA_B*57:01	-1.10374	0.56105	-1.96728	0.05195	0.039604	0.697508
imputed_HLA_C*01	1.57784	0.694141	2.27309	0.0251816	0.0247525	0.697508
imputed_HLA_C*01:02	1.57784	0.694141	2.27309	0.0251816	0.0247525	0.697508
imputed_HLA_C*02	-0.445465	0.401099	-1.11061	0.269425	0.0891089	0.822443
imputed_HLA_C*02:02	-0.445465	0.401099	-1.11061	0.269425	0.0891089	0.822443
imputed_HLA_C*03	-0.290197	0.299131	-0.970132	0.334345	0.143564	0.822443
imputed_HLA_C*03:03	-0.456838	0.651783	-0.700904	0.485007	0.029703	0.822443
imputed_HLA_C*03:04	-0.237213	0.331882	-0.714749	0.476446	0.113861	0.822443
imputed_HLA_C*04	0.361573	0.411209	0.879293	0.381372	0.0841584	0.822443
imputed_HLA_C*04:01	0.361573	0.411209	0.879293	0.381372	0.0841584	0.822443
imputed_HLA_C*05	-0.403757	0.369622	-1.09235	0.277329	0.0940594	0.822443
imputed_HLA_C*05:01	-0.403757	0.369622	-1.09235	0.277329	0.0940594	0.822443
imputed_HLA_C*06	0.0779735	0.302933	0.257395	0.797408	0.138614	0.928543
imputed_HLA_C*06:02	0.0779735	0.302933	0.257395	0.797408	0.138614	0.928543
imputed_HLA_C*07	-0.140563	0.254964	-0.551305	0.582667	0.277228	0.827485
imputed_HLA_C*07:01	-0.266887	0.331503	-0.805081	0.422702	0.133663	0.822443
imputed_HLA_C*07:02	0.0672901	0.357817	0.188057	0.851217	0.123762	0.971998
imputed_HLA_C*07:04	-0.16825	0.791773	-0.212498	0.832156	0.019802	0.956696
imputed_HLA_C*12	0.360108	0.377061	0.95504	0.341884	0.0891089	0.822443
imputed_HLA_C*12:02	0.589027	0.789738	0.745851	0.457524	0.019802	0.822443
imputed_HLA_C*12:03	0.269155	0.413088	0.65157	0.516188	0.0693069	0.822443
imputed_HLA_C*15	-0.319206	0.791303	-0.403392	0.68753	0.019802	0.860685
imputed_HLA_C*15:02	-0.319206	0.791303	-0.403392	0.68753	0.019802	0.860685
imputed_HLA_C*16	1.6623	0.89432	1.85873	0.0660363	0.0148515	0.697508
imputed_HLA_DPA1*01	0.0422654	0.324965	0.130061	0.896782	0.876238	0.97331
imputed_HLA_DPA1*01:03	-0.00807937	0.305699	-0.0264292	0.978968	0.866337	0.978968
imputed_HLA_DPA1*02	-0.0422654	0.324965	-0.130061	0.896782	0.123762	0.97331
imputed_HLA_DPA1*02:01	0.0116686	0.328722	0.0354968	0.971755	0.118812	0.978968
imputed_HLA_DPB1*01	-0.421396	0.465882	-0.904511	0.36792	0.049505	0.822443
imputed_HLA_DPB1*01:01	-0.421396	0.465882	-0.904511	0.36792	0.049505	0.822443
imputed_HLA_DPB1*02	-0.0130882	0.294069	-0.0445074	0.96459	0.158416	0.978968
imputed_HLA_DPB1*02:01	-0.0130882	0.294069	-0.0445074	0.96459	0.158416	0.978968
imputed_HLA_DPB1*03	-0.153784	0.357547	-0.430108	0.668052	0.123762	0.860685
imputed_HLA_DPB1*03:01	-0.153784	0.357547	-0.430108	0.668052	0.123762	0.860685
imputed_HLA_DPB1*04	0.0842756	0.226233	0.372517	0.710304	0.549505	0.876215
imputed_HLA_DPB1*04:01	0.131523	0.21526	0.610996	0.542603	0.445545	0.822443
imputed_HLA_DPB1*04:02	-0.153023	0.359259	-0.42594	0.671076	0.10396	0.860685
imputed_HLA_DPB1*09	0.319215	0.791303	0.403404	0.687521	0.019802	0.860685
imputed_HLA_DPB1*09:01	0.319215	0.791303	0.403404	0.687521	0.019802	0.860685
imputed_HLA_DPB1*10	-0.660135	0.593646	-1.112	0.268831	0.0247525	0.822443
imputed_HLA_DPB1*10:01	-0.660135	0.593646	-1.112	0.268831	0.0247525	0.822443
imputed_HLA_DPB1*13	-0.319206	0.791303	-0.403392	0.68753	0.019802	0.860685
imputed_HLA_DPB1*13:01	-0.319206	0.791303	-0.403392	0.68753	0.019802	0.860685
imputed_HLA_DPB1*17	1.48599	0.777744	1.91064	0.0589448	0.019802	0.697508
imputed_HLA_DPB1*17:01	1.48599	0.777744	1.91064	0.0589448	0.019802	0.697508
imputed_HLA_DQA1*01	0.192868	0.246823	0.781401	0.436431	0.371287	0.822443
imputed_HLA_DQA1*01:01	0.299936	0.379397	0.790559	0.431091	0.10396	0.822443
imputed_HLA_DQA1*01:02	-0.203274	0.294203	-0.690931	0.491226	0.188119	0.822443
imputed_HLA_DQA1*01:03	0.68298	0.456077	1.49751	0.137442	0.0643564	0.814385
imputed_HLA_DQA1*02	0.204448	0.325337	0.62842	0.531176	0.143564	0.822443
imputed_HLA_DQA1*02:01	0.204448	0.325337	0.62842	0.531176	0.143564	0.822443
imputed_HLA_DQA1*03	-0.524248	0.275826	-1.90065	0.060257	0.168317	0.697508
imputed_HLA_DQA1*03:01	-0.369932	0.350213	-1.05631	0.293399	0.0940594	0.822443
imputed_HLA_DQA1*03:03	-0.541103	0.410385	-1.31853	0.19037	0.0693069	0.822443
imputed_HLA_DQA1*04	-0.0512588	0.608117	-0.0842911	0.932995	0.0346535	0.97331
imputed_HLA_DQA1*04:01	-0.0512588	0.608117	-0.0842911	0.932995	0.0346535	0.97331
imputed_HLA_DQA1*05	0.162664	0.269916	0.602645	0.548123	0.277228	0.822443
imputed_HLA_DQA1*05:01	-0.255163	0.35715	-0.714443	0.476635	0.0891089	0.822443
imputed_HLA_DQA1*05:05	0.366563	0.292601	1.25277	0.213239	0.188119	0.822443
imputed_HLA_DQB1*02	0.0936331	0.284654	0.328936	0.742899	0.188119	0.890425
imputed_HLA_DQB1*02:01	-0.255163	0.35715	-0.714443	0.476635	0.0891089	0.822443
imputed_HLA_DQB1*02:02	0.472345	0.384659	1.22796	0.222374	0.0990099	0.822443
imputed_HLA_DQB1*03	-0.202896	0.219846	-0.9229	0.358303	0.405941	0.822443
imputed_HLA_DQB1*03:01	-0.0314871	0.269181	-0.116973	0.907118	0.252475	0.97331
imputed_HLA_DQB1*03:02	-0.254396	0.345801	-0.735672	0.46367	0.0990099	0.822443
imputed_HLA_DQB1*03:03	-0.3783	0.466256	-0.811358	0.419107	0.049505	0.822443
imputed_HLA_DQB1*04	-0.0512588	0.608117	-0.0842911	0.932995	0.0346535	0.97331
imputed_HLA_DQB1*04:02	-0.0512588	0.608117	-0.0842911	0.932995	0.0346535	0.97331
imputed_HLA_DQB1*05	0.167189	0.314842	0.531024	0.596591	0.138614	0.840199
imputed_HLA_DQB1*05:01	0.304293	0.347827	0.874841	0.383778	0.113861	0.822443
imputed_HLA_DQB1*05:02	-0.747926	0.696401	-1.07399	0.285439	0.0148515	0.822443
imputed_HLA_DQB1*06	0.121144	0.287346	0.421598	0.674233	0.232673	0.860685
imputed_HLA_DQB1*06:01	0.589027	0.789738	0.745851	0.457524	0.019802	0.822443
imputed_HLA_DQB1*06:02	-0.240142	0.344199	-0.697683	0.487011	0.138614	0.822443
imputed_HLA_DQB1*06:03	0.667617	0.537958	1.24102	0.217531	0.0445545	0.822443
imputed_HLA_DQB1*06:04	0.115662	0.653295	0.177044	0.859836	0.029703	0.97331
imputed_HLA_DRB1*01	0.195998	0.353624	0.554254	0.580655	0.108911	0.827485
imputed_HLA_DRB1*01:01	0.387376	0.385617	1.00456	0.317556	0.0990099	0.822443
imputed_HLA_DRB1*03	-0.255163	0.35715	-0.714443	0.476635	0.0891089	0.822443
imputed_HLA_DRB1*03:01	-0.255163	0.35715	-0.714443	0.476635	0.0891089	0.822443
imputed_HLA_DRB1*04	-0.487035	0.289969	-1.67961	0.096187	0.158416	0.70016
imputed_HLA_DRB1*04:01	-0.648059	0.348132	-1.86153	0.0656358	0.108911	0.697508
imputed_HLA_DRB1*04:03	-0.0591786	0.608109	-0.0973157	0.922672	0.0346535	0.97331
imputed_HLA_DRB1*07	0.204448	0.325337	0.62842	0.531176	0.143564	0.822443
imputed_HLA_DRB1*07:01	0.204448	0.325337	0.62842	0.531176	0.143564	0.822443
imputed_HLA_DRB1*08	-0.339423	0.541052	-0.62734	0.531881	0.0445545	0.822443
imputed_HLA_DRB1*08:01	-0.0512588	0.608117	-0.0842911	0.932995	0.0346535	0.97331
imputed_HLA_DRB1*11	0.343428	0.324153	1.05946	0.291967	0.143564	0.822443
imputed_HLA_DRB1*11:01	0.455617	0.354939	1.28365	0.202261	0.123762	0.822443
imputed_HLA_DRB1*13	0.750523	0.346047	2.16885	0.032489	0.108911	0.697508
imputed_HLA_DRB1*13:01	0.667617	0.537958	1.24102	0.217531	0.0445545	0.822443
imputed_HLA_DRB1*13:02	0.445381	0.606489	0.73436	0.464465	0.0346535	0.822443
imputed_HLA_DRB1*13:03	1.07047	0.64448	1.66098	0.0998821	0.029703	0.70016
imputed_HLA_DRB1*15	-0.205493	0.312567	-0.657435	0.512427	0.168317	0.822443
imputed_HLA_DRB1*15:01	-0.346556	0.336208	-1.03078	0.305156	0.148515	0.822443
imputed_HLA_DRB1*15:02	0.589027	0.789738	0.745851	0.457524	0.019802	0.822443
imputed_HLA_DRB3*00	-0.376842	0.230284	-1.63642	0.104926	0.638614	0.70016
imputed_HLA_DRB3*00:00	-0.376842	0.230284	-1.63642	0.104926	0.638614	0.70016
imputed_HLA_DRB3*01	0.0337235	0.324976	0.103772	0.91756	0.123762	0.97331
imputed_HLA_DRB3*01:01	0.0337235	0.324976	0.103772	0.91756	0.123762	0.97331
imputed_HLA_DRB3*02	0.401766	0.269878	1.48869	0.139746	0.20297	0.814385
imputed_HLA_DRB3*02:02	0.471644	0.278648	1.69262	0.0936736	0.19802	0.70016
imputed_HLA_DRB3*03	0.445381	0.606489	0.73436	0.464465	0.0346535	0.822443
imputed_HLA_DRB3*03:01	0.445381	0.606489	0.73436	0.464465	0.0346535	0.822443
imputed_HLA_DRB4*00	0.231182	0.233009	0.992158	0.323539	0.693069	0.822443
imputed_HLA_DRB4*00:00	0.231182	0.233009	0.992158	0.323539	0.693069	0.822443
imputed_HLA_DRB4*01	-0.231182	0.233009	-0.992158	0.323539	0.306931	0.822443
imputed_HLA_DRB4*01:01	1.84568	0.769923	2.39723	0.0183955	0.019802	0.697508
imputed_HLA_DRB4*01:03	-0.385935	0.228923	-1.68588	0.094969	0.287129	0.70016
imputed_HLA_DRB5*00	0.233338	0.298521	0.781647	0.436288	0.826733	0.822443
imputed_HLA_DRB5*00:00	0.233338	0.298521	0.781647	0.436288	0.826733	0.822443
imputed_HLA_DRB5*01	-0.205493	0.312567	-0.657435	0.512427	0.168317	0.822443
imputed_HLA_DRB5*01:01	-0.346556	0.336208	-1.03078	0.305156	0.148515	0.822443
imputed_HLA_DRB5*01:02	0.589027	0.789738	0.745851	0.457524	0.019802	0.822443

## Sheet: B_210421_controls_HLA_glm
summary reults of glm models for the association between abundance of CAIT cells and HLA genotype in Healthy controls
BETA	SE	Z	P	MAF	P_FDR
imputed_HLA_A*01	0.292705	0.179882	1.6272	0.107077	0.173684	0.808548
imputed_HLA_A*01:01	0.292705	0.179882	1.6272	0.107077	0.173684	0.808548
imputed_HLA_A*02	0.0529766	0.126753	0.417951	0.676946	0.342105	0.953879
imputed_HLA_A*02:01	-0.00136772	0.128774	-0.0106211	0.991549	0.331579	0.992571
imputed_HLA_A*03	-0.29979	0.203543	-1.47285	0.144167	0.115789	0.808548
imputed_HLA_A*03:01	-0.29979	0.203543	-1.47285	0.144167	0.115789	0.808548
imputed_HLA_A*11	-0.0930252	0.282862	-0.328871	0.742992	0.0526316	0.957709
imputed_HLA_A*11:01	-0.0930252	0.282862	-0.328871	0.742992	0.0526316	0.957709
imputed_HLA_A*23	-0.0246594	0.432492	-0.057017	0.954654	0.0210526	0.99193
imputed_HLA_A*23:01	-0.0246594	0.432492	-0.057017	0.954654	0.0210526	0.99193
imputed_HLA_A*24	-0.0706116	0.221203	-0.319216	0.750279	0.0789474	0.957709
imputed_HLA_A*24:02	-0.0706116	0.221203	-0.319216	0.750279	0.0789474	0.957709
imputed_HLA_A*25	0.23583	0.356242	0.661995	0.509612	0.0315789	0.850659
imputed_HLA_A*25:01	0.23583	0.356242	0.661995	0.509612	0.0315789	0.850659
imputed_HLA_A*26	-0.641616	0.601365	-1.06693	0.288764	0.0105263	0.824498
imputed_HLA_A*26:01	-0.641616	0.601365	-1.06693	0.288764	0.0105263	0.824498
imputed_HLA_A*29	-0.178943	0.38854	-0.460554	0.646194	0.0263158	0.929758
imputed_HLA_A*29:02	-0.057292	0.432459	-0.13248	0.894891	0.0210526	0.980764
imputed_HLA_A*30	0.47552	0.429679	1.10669	0.271284	0.0210526	0.824498
imputed_HLA_A*30:01	0.843332	0.488927	1.72486	0.0878739	0.0157895	0.808548
imputed_HLA_A*31	0.195914	0.432022	0.45348	0.651259	0.0210526	0.929758
imputed_HLA_A*31:01	0.195914	0.432022	0.45348	0.651259	0.0210526	0.929758
imputed_HLA_A*32	-0.046358	0.296557	-0.156321	0.876119	0.0473684	0.980764
imputed_HLA_A*32:01	-0.046358	0.296557	-0.156321	0.876119	0.0473684	0.980764
imputed_HLA_A*33	-0.0174791	0.605031	-0.0288895	0.977015	0.0105263	0.992571
imputed_HLA_A*33:01	-0.0174791	0.605031	-0.0288895	0.977015	0.0105263	0.992571
imputed_HLA_A*68	-0.326111	0.310941	-1.04878	0.296995	0.0421053	0.825225
imputed_HLA_A*68:01	-0.271595	0.33127	-0.819861	0.414392	0.0368421	0.850659
imputed_HLA_B*07	0.136711	0.161329	0.847405	0.398945	0.142105	0.850659
imputed_HLA_B*07:02	0.136711	0.161329	0.847405	0.398945	0.142105	0.850659
imputed_HLA_B*08	0.252034	0.211445	1.19196	0.236311	0.105263	0.824498
imputed_HLA_B*08:01	0.252034	0.211445	1.19196	0.236311	0.105263	0.824498
imputed_HLA_B*13	0.512746	0.3531	1.45213	0.149831	0.0315789	0.808548
imputed_HLA_B*13:02	0.512746	0.3531	1.45213	0.149831	0.0315789	0.808548
imputed_HLA_B*14	-0.056189	0.388939	-0.144467	0.885444	0.0263158	0.980764
imputed_HLA_B*14:01	-0.641616	0.601365	-1.06693	0.288764	0.0105263	0.824498
imputed_HLA_B*14:02	0.340781	0.495427	0.687852	0.493258	0.0157895	0.850659
imputed_HLA_B*15	-0.304074	0.189447	-1.60506	0.11187	0.121053	0.808548
imputed_HLA_B*15:01	-0.41709	0.212796	-1.96005	0.0529833	0.1	0.808548
imputed_HLA_B*15:17	-0.057151	0.496651	-0.115073	0.908636	0.0157895	0.990824
imputed_HLA_B*18	-0.110759	0.332267	-0.333345	0.739624	0.0368421	0.957709
imputed_HLA_B*18:01	-0.110759	0.332267	-0.333345	0.739624	0.0368421	0.957709
imputed_HLA_B*27	-0.107734	0.604931	-0.178092	0.859038	0.0105263	0.980764
imputed_HLA_B*27:05	-0.107734	0.604931	-0.178092	0.859038	0.0105263	0.980764
imputed_HLA_B*35	-0.325078	0.229632	-1.41565	0.160219	0.0842105	0.808548
imputed_HLA_B*35:01	-0.494388	0.292132	-1.69234	0.0939285	0.0473684	0.808548
imputed_HLA_B*35:03	-0.0458486	0.332431	-0.137919	0.890602	0.0368421	0.980764
imputed_HLA_B*37	-0.641616	0.601365	-1.06693	0.288764	0.0105263	0.824498
imputed_HLA_B*37:01	-0.641616	0.601365	-1.06693	0.288764	0.0105263	0.824498
imputed_HLA_B*38	-0.64859	0.492111	-1.31797	0.19075	0.0157895	0.824498
imputed_HLA_B*38:01	-0.64859	0.492111	-1.31797	0.19075	0.0157895	0.824498
imputed_HLA_B*39	0.00363133	0.388982	0.00933547	0.992571	0.0263158	0.992571
imputed_HLA_B*39:01	0.168419	0.432147	0.389725	0.697631	0.0210526	0.957709
imputed_HLA_B*40	-0.149259	0.271015	-0.550739	0.583133	0.0578947	0.916956
imputed_HLA_B*40:01	-0.0239979	0.296586	-0.0809139	0.935684	0.0473684	0.99193
imputed_HLA_B*40:02	-0.641616	0.601365	-1.06693	0.288764	0.0105263	0.824498
imputed_HLA_B*41	0.131881	0.496498	0.265622	0.791118	0.0157895	0.980764
imputed_HLA_B*41:02	0.516502	0.602659	0.857039	0.393627	0.0105263	0.850659
imputed_HLA_B*44	-0.210305	0.173926	-1.20917	0.229664	0.142105	0.824498
imputed_HLA_B*44:02	-0.314097	0.213933	-1.4682	0.145424	0.0842105	0.808548
imputed_HLA_B*44:03	-0.354654	0.310605	-1.14181	0.256462	0.0421053	0.824498
imputed_HLA_B*44:05	0.439569	0.603315	0.72859	0.468083	0.0105263	0.850659
imputed_HLA_B*49	0.403339	0.494922	0.814956	0.41718	0.0157895	0.850659
imputed_HLA_B*49:01	0.403339	0.494922	0.814956	0.41718	0.0157895	0.850659
imputed_HLA_B*50	0.366872	0.495227	0.740817	0.460671	0.0157895	0.850659
imputed_HLA_B*50:01	0.366872	0.495227	0.740817	0.460671	0.0157895	0.850659
imputed_HLA_B*51	0.430681	0.257619	1.67178	0.0979293	0.0631579	0.808548
imputed_HLA_B*51:01	0.430681	0.257619	1.67178	0.0979293	0.0631579	0.808548
imputed_HLA_B*55	0.732076	0.49085	1.49144	0.139229	0.0157895	0.808548
imputed_HLA_B*55:01	0.732076	0.49085	1.49144	0.139229	0.0157895	0.808548
imputed_HLA_B*56	0.486935	0.602924	0.807624	0.421368	0.0105263	0.850659
imputed_HLA_B*56:01	0.486935	0.602924	0.807624	0.421368	0.0105263	0.850659
imputed_HLA_B*57	0.0502322	0.357042	0.14069	0.888419	0.0315789	0.980764
imputed_HLA_B*57:01	0.0502322	0.357042	0.14069	0.888419	0.0315789	0.980764
imputed_HLA_C*01	0.323623	0.330767	0.978402	0.330414	0.0368421	0.843527
imputed_HLA_C*01:02	0.323623	0.330767	0.978402	0.330414	0.0368421	0.843527
imputed_HLA_C*02	0.00455826	0.388982	0.0117184	0.990675	0.0263158	0.992571
imputed_HLA_C*02:02	0.00455826	0.388982	0.0117184	0.990675	0.0263158	0.992571
imputed_HLA_C*03	-0.315285	0.175351	-1.79802	0.0754191	0.157895	0.808548
imputed_HLA_C*03:03	-0.269075	0.270019	-0.996505	0.32159	0.0578947	0.842758
imputed_HLA_C*03:04	-0.264368	0.219942	-1.20199	0.232418	0.0947368	0.824498
imputed_HLA_C*04	-0.441321	0.200754	-2.19832	0.0304077	0.115789	0.599861
imputed_HLA_C*04:01	-0.441321	0.200754	-2.19832	0.0304077	0.115789	0.599861
imputed_HLA_C*05	-0.437593	0.257493	-1.69943	0.0925799	0.0631579	0.808548
imputed_HLA_C*05:01	-0.437593	0.257493	-1.69943	0.0925799	0.0631579	0.808548
imputed_HLA_C*06	0.222954	0.202818	1.09928	0.274484	0.1	0.824498
imputed_HLA_C*06:02	0.222954	0.202818	1.09928	0.274484	0.1	0.824498
imputed_HLA_C*07	0.279059	0.12548	2.22393	0.0285741	0.331579	0.599861
imputed_HLA_C*07:01	0.266092	0.184813	1.43979	0.153284	0.157895	0.808548
imputed_HLA_C*07:02	0.163495	0.152287	1.0736	0.285781	0.157895	0.824498
imputed_HLA_C*07:04	0.553625	0.493357	1.12216	0.264683	0.0157895	0.824498
imputed_HLA_C*08	-0.159092	0.356699	-0.446013	0.656625	0.0315789	0.931291
imputed_HLA_C*08:02	-0.056189	0.388939	-0.144467	0.885444	0.0263158	0.980764
imputed_HLA_C*12	0.171582	0.282467	0.607441	0.545039	0.0526316	0.864325
imputed_HLA_C*12:03	0.145008	0.296215	0.489536	0.625615	0.0473684	0.927387
imputed_HLA_C*14	-0.118379	0.496534	-0.238411	0.812087	0.0157895	0.980764
imputed_HLA_C*14:02	-0.118379	0.496534	-0.238411	0.812087	0.0157895	0.980764
imputed_HLA_C*15	0.0224471	0.388976	0.0577083	0.954105	0.0263158	0.99193
imputed_HLA_C*15:02	0.0224471	0.388976	0.0577083	0.954105	0.0263158	0.99193
imputed_HLA_C*16	0.0734937	0.388908	0.188975	0.850524	0.0263158	0.980764
imputed_HLA_C*16:01	0.0734937	0.388908	0.188975	0.850524	0.0263158	0.980764
imputed_HLA_C*17	0.131881	0.496498	0.265622	0.791118	0.0157895	0.980764
imputed_HLA_C*17:03	0.516502	0.602659	0.857039	0.393627	0.0105263	0.850659
imputed_HLA_DPA1*01	0.122732	0.202371	0.606471	0.54568	0.878947	0.864325
imputed_HLA_DPA1*01:03	0.154293	0.199254	0.774354	0.440685	0.873684	0.850659
imputed_HLA_DPA1*02	-0.122732	0.202371	-0.606471	0.54568	0.121053	0.864325
imputed_HLA_DPA1*02:01	-0.0491563	0.221585	-0.22184	0.824925	0.0947368	0.980764
imputed_HLA_DPA1*02:02	-0.300254	0.387734	-0.77438	0.440671	0.0263158	0.850659
imputed_HLA_DPB1*01	0.11885	0.356867	0.333038	0.739855	0.0315789	0.957709
imputed_HLA_DPB1*01:01	0.11885	0.356867	0.333038	0.739855	0.0315789	0.957709
imputed_HLA_DPB1*02	-0.0102638	0.182869	-0.0561265	0.955361	0.121053	0.99193
imputed_HLA_DPB1*02:01	-0.0102638	0.182869	-0.0561265	0.955361	0.121053	0.99193
imputed_HLA_DPB1*03	-0.258849	0.174925	-1.47977	0.142315	0.136842	0.808548
imputed_HLA_DPB1*03:01	-0.258849	0.174925	-1.47977	0.142315	0.136842	0.808548
imputed_HLA_DPB1*04	0.163425	0.121068	1.34986	0.180338	0.589474	0.824498
imputed_HLA_DPB1*04:01	0.27604	0.121292	2.27583	0.0251516	0.452632	0.599861
imputed_HLA_DPB1*04:02	-0.196953	0.168479	-1.16901	0.245389	0.136842	0.824498
imputed_HLA_DPB1*05	-0.207263	0.431965	-0.479815	0.632485	0.0210526	0.927387
imputed_HLA_DPB1*05:01	-0.207263	0.431965	-0.479815	0.632485	0.0210526	0.927387
imputed_HLA_DPB1*10	-0.286857	0.431475	-0.664828	0.507806	0.0210526	0.850659
imputed_HLA_DPB1*10:01	-0.286857	0.431475	-0.664828	0.507806	0.0210526	0.850659
imputed_HLA_DPB1*13	0.118812	0.356868	0.33293	0.739936	0.0315789	0.957709
imputed_HLA_DPB1*13:01	0.118812	0.356868	0.33293	0.739936	0.0315789	0.957709
imputed_HLA_DPB1*14	-0.118379	0.496534	-0.238411	0.812087	0.0157895	0.980764
imputed_HLA_DPB1*14:01	-0.118379	0.496534	-0.238411	0.812087	0.0157895	0.980764
imputed_HLA_DPB1*17	0.120967	0.432318	0.279809	0.780245	0.0210526	0.980764
imputed_HLA_DPB1*17:01	0.120967	0.432318	0.279809	0.780245	0.0210526	0.980764
imputed_HLA_DQA1*01	0.115947	0.114872	1.00936	0.315423	0.442105	0.842758
imputed_HLA_DQA1*01:01	-0.282767	0.198568	-1.42403	0.157784	0.105263	0.808548
imputed_HLA_DQA1*01:02	0.269829	0.128515	2.0996	0.0384725	0.221053	0.695711
imputed_HLA_DQA1*01:03	0.0799966	0.221169	0.361699	0.718397	0.0789474	0.957709
imputed_HLA_DQA1*01:04	0.0350437	0.388966	0.0900947	0.928406	0.0263158	0.99193
imputed_HLA_DQA1*01:05	-0.641616	0.601365	-1.06693	0.288764	0.0105263	0.824498
imputed_HLA_DQA1*02	0.0940107	0.184903	0.508433	0.612354	0.115789	0.922783
imputed_HLA_DQA1*02:01	0.0940107	0.184903	0.508433	0.612354	0.115789	0.922783
imputed_HLA_DQA1*03	-0.192037	0.18418	-1.04266	0.299809	0.136842	0.825225
imputed_HLA_DQA1*03:01	-0.111056	0.216841	-0.512155	0.609757	0.1	0.922783
imputed_HLA_DQA1*03:02	-0.107734	0.604931	-0.178092	0.859038	0.0105263	0.980764
imputed_HLA_DQA1*03:03	-0.445772	0.386226	-1.15417	0.251386	0.0263158	0.824498
imputed_HLA_DQA1*04	-0.181317	0.296	-0.612559	0.541663	0.0473684	0.864325
imputed_HLA_DQA1*04:01	-0.181317	0.296	-0.612559	0.541663	0.0473684	0.864325
imputed_HLA_DQA1*05	-0.0581531	0.141468	-0.411069	0.681968	0.252632	0.954755
imputed_HLA_DQA1*05:01	0.13393	0.189801	0.705637	0.482178	0.105263	0.850659
imputed_HLA_DQA1*05:05	-0.199148	0.172495	-1.15451	0.251248	0.147368	0.824498
imputed_HLA_DQB1*02	0.175612	0.152569	1.15103	0.25267	0.189474	0.824498
imputed_HLA_DQB1*02:01	0.13393	0.189801	0.705637	0.482178	0.105263	0.850659
imputed_HLA_DQB1*02:02	0.175155	0.215635	0.812278	0.418707	0.0842105	0.850659
imputed_HLA_DQB1*03	-0.230048	0.125629	-1.83117	0.0702771	0.321053	0.808548
imputed_HLA_DQB1*03:01	-0.289138	0.16385	-1.76465	0.0809061	0.178947	0.808548
imputed_HLA_DQB1*03:02	-0.111056	0.216841	-0.512155	0.609757	0.1	0.922783
imputed_HLA_DQB1*03:03	-0.12645	0.3125	-0.40464	0.686672	0.0421053	0.955178
imputed_HLA_DQB1*04	-0.181317	0.296	-0.612559	0.541663	0.0473684	0.864325
imputed_HLA_DQB1*04:02	-0.181317	0.296	-0.612559	0.541663	0.0473684	0.864325
imputed_HLA_DQB1*05	-0.195402	0.164317	-1.18917	0.237399	0.152632	0.824498
imputed_HLA_DQB1*05:01	-0.300713	0.182515	-1.64761	0.102808	0.115789	0.808548
imputed_HLA_DQB1*05:02	0.516502	0.602659	0.857039	0.393627	0.0105263	0.850659
imputed_HLA_DQB1*05:03	0.0350437	0.388966	0.0900947	0.928406	0.0263158	0.99193
imputed_HLA_DQB1*06	0.251089	0.123262	2.03704	0.0444887	0.289474	0.742618
imputed_HLA_DQB1*06:01	0.364042	0.495249	0.735068	0.464148	0.0157895	0.850659
imputed_HLA_DQB1*06:02	0.445645	0.151622	2.93917	0.00415047	0.157895	0.18013
imputed_HLA_DQB1*06:03	0.0107627	0.261458	0.0411643	0.967253	0.0631579	0.992571
imputed_HLA_DQB1*06:04	-0.235208	0.295592	-0.795717	0.428223	0.0473684	0.850659
imputed_HLA_DRB1*01	-0.282767	0.198568	-1.42403	0.157784	0.105263	0.808548
imputed_HLA_DRB1*01:01	-0.352312	0.213292	-1.65178	0.101952	0.0842105	0.808548
imputed_HLA_DRB1*01:02	0.340781	0.495427	0.687852	0.493258	0.0157895	0.850659
imputed_HLA_DRB1*03	0.13393	0.189801	0.705637	0.482178	0.105263	0.850659
imputed_HLA_DRB1*03:01	0.13393	0.189801	0.705637	0.482178	0.105263	0.850659
imputed_HLA_DRB1*04	-0.163214	0.191306	-0.853157	0.395764	0.121053	0.850659
imputed_HLA_DRB1*04:01	-0.165364	0.226124	-0.731297	0.466436	0.0736842	0.850659
imputed_HLA_DRB1*04:02	-0.116863	0.496538	-0.235356	0.81445	0.0157895	0.980764
imputed_HLA_DRB1*04:03	0.467082	0.494319	0.944901	0.347158	0.0157895	0.850659
imputed_HLA_DRB1*04:05	-0.641616	0.601365	-1.06693	0.288764	0.0105263	0.824498
imputed_HLA_DRB1*07	0.0940107	0.184903	0.508433	0.612354	0.115789	0.922783
imputed_HLA_DRB1*07:01	0.0940107	0.184903	0.508433	0.612354	0.115789	0.922783
imputed_HLA_DRB1*08	-0.281039	0.269888	-1.04132	0.300427	0.0578947	0.825225
imputed_HLA_DRB1*08:01	-0.222546	0.331663	-0.671001	0.503883	0.0368421	0.850659
imputed_HLA_DRB1*08:02	-0.227976	0.496123	-0.459515	0.646937	0.0157895	0.929758
imputed_HLA_DRB1*09	-0.107734	0.604931	-0.178092	0.859038	0.0105263	0.980764
imputed_HLA_DRB1*09:01	-0.107734	0.604931	-0.178092	0.859038	0.0105263	0.980764
imputed_HLA_DRB1*10	-0.641616	0.601365	-1.06693	0.288764	0.0105263	0.824498
imputed_HLA_DRB1*10:01	-0.641616	0.601365	-1.06693	0.288764	0.0105263	0.824498
imputed_HLA_DRB1*11	-0.277118	0.224773	-1.23288	0.220728	0.0894737	0.824498
imputed_HLA_DRB1*11:01	-0.280325	0.243306	-1.15215	0.252212	0.0736842	0.824498
imputed_HLA_DRB1*11:04	-0.179603	0.496337	-0.361857	0.71828	0.0157895	0.957709
imputed_HLA_DRB1*12	0.254648	0.331415	0.768366	0.444217	0.0368421	0.850659
imputed_HLA_DRB1*12:01	0.254648	0.331415	0.768366	0.444217	0.0368421	0.850659
imputed_HLA_DRB1*13	-0.192494	0.177674	-1.08341	0.281426	0.131579	0.824498
imputed_HLA_DRB1*13:01	0.0107627	0.261458	0.0411643	0.967253	0.0631579	0.992571
imputed_HLA_DRB1*13:02	-0.232424	0.254733	-0.912423	0.363905	0.0526316	0.850659
imputed_HLA_DRB1*13:03	-0.64859	0.492111	-1.31797	0.19075	0.0157895	0.824498
imputed_HLA_DRB1*14	0.0350437	0.388966	0.0900947	0.928406	0.0263158	0.99193
imputed_HLA_DRB1*14:54	0.207253	0.431965	0.47979	0.632503	0.0210526	0.927387
imputed_HLA_DRB1*15	0.440544	0.148117	2.9743	0.00374058	0.178947	0.18013
imputed_HLA_DRB1*15:01	0.418377	0.151431	2.76282	0.00690699	0.163158	0.214117
imputed_HLA_DRB1*15:02	0.364042	0.495249	0.735068	0.464148	0.0157895	0.850659
imputed_HLA_DRB1*16	0.516502	0.602659	0.857039	0.393627	0.0105263	0.850659
imputed_HLA_DRB1*16:01	0.516502	0.602659	0.857039	0.393627	0.0105263	0.850659
imputed_HLA_DRB3*00	0.094878	0.124722	0.760713	0.448753	0.605263	0.850659
imputed_HLA_DRB3*00:00	0.094878	0.124722	0.760713	0.448753	0.605263	0.850659
imputed_HLA_DRB3*01	0.171936	0.17281	0.994944	0.322345	0.147368	0.842758
imputed_HLA_DRB3*01:01	0.171936	0.17281	0.994944	0.322345	0.147368	0.842758
imputed_HLA_DRB3*02	-0.239249	0.168914	-1.4164	0.160001	0.194737	0.808548
imputed_HLA_DRB3*02:02	-0.239249	0.168914	-1.4164	0.160001	0.194737	0.808548
imputed_HLA_DRB3*03	-0.232424	0.254733	-0.912423	0.363905	0.0526316	0.850659
imputed_HLA_DRB3*03:01	-0.232424	0.254733	-0.912423	0.363905	0.0526316	0.850659
imputed_HLA_DRB4*00	0.0233943	0.145757	0.160502	0.872834	0.757895	0.980764
imputed_HLA_DRB4*00:00	0.0233943	0.145757	0.160502	0.872834	0.757895	0.980764
imputed_HLA_DRB4*01	-0.0233943	0.145757	-0.160502	0.872834	0.242105	0.980764
imputed_HLA_DRB4*01:01	-0.451489	0.353998	-1.2754	0.205344	0.0315789	0.824498
imputed_HLA_DRB4*01:03	0.0599783	0.156659	0.38286	0.702697	0.210526	0.957709
imputed_HLA_DRB5*00	-0.466218	0.145849	-3.19659	0.00190044	0.810526	0.18013
imputed_HLA_DRB5*00:00	-0.466218	0.145849	-3.19659	0.00190044	0.810526	0.18013
imputed_HLA_DRB5*01	0.440544	0.148117	2.9743	0.00374058	0.178947	0.18013
imputed_HLA_DRB5*01:01	0.418377	0.151431	2.76282	0.00690699	0.163158	0.214117
imputed_HLA_DRB5*01:02	0.364042	0.495249	0.735068	0.464148	0.0157895	0.850659
imputed_HLA_DRB5*02	0.516502	0.602659	0.857039	0.393627	0.0105263	0.850659
imputed_HLA_DRB5*02:02	0.516502	0.602659	0.857039	0.393627	0.0105263	0.850659

## Sheet: C_glm_CAIT%_CD_clinical_info
Summary of the glm model assessing association between % of CAIT cells in CD patients and clinical and demographic covariates
Call:
glm(formula = log ~ gender + age_group + smoker + disease_location_group +
disease_activity + group, family = "gaussian", data = xmodelCD)
Deviance Residuals:
Min 1Q Median 3Q Max
-1.9700 -1.2974 -0.4984 1.3124 3.2575
Coefficients:
Estimate Std. Error t value Pr(>|t|)
(Intercept) -4.114999 0.808798 -5.088 2.39e-06 ***
gendermale 0.206205 0.348096 0.592 0.5553
age_groupA2_17_40 0.397320 0.664874 0.598 0.5518
age_groupA3_40 -0.476187 0.730829 -0.652 0.5166
smokerformer -0.002574 0.432376 -0.006 0.9953
smokernever -0.015346 0.422066 -0.036 0.9711
disease_location_groupL2_colon -0.904547 0.493893 -1.831 0.0708 .
disease_location_groupL3_ileumcolon -0.367425 0.411544 -0.893 0.3747
disease_activitymoderate -0.378621 0.390540 -0.969 0.3353
disease_activitysevere -0.597485 0.560971 -1.065 0.2901
groupresponder -0.503135 0.360609 -1.395 0.1669
---
Signif. codes: 0 ‘***’ 0.001 ‘**’ 0.01 ‘*’ 0.05 ‘.’ 0.1 ‘ ’ 1
(Dispersion parameter for gaussian family taken to be 2.51918)
Null deviance: 225.57 on 89 degrees of freedom
Residual deviance: 199.02 on 79 degrees of freedom
AIC: 350.83
Number of Fisher Scoring iterations: 2

## Sheet: D_glm_CAITn_CD_clinical_info
Summary of the glm model assessing association between number of CAIT cells in CD patients and clinical and demographic covariates
Call:
glm(formula = percentage ~ gender + age_group + smoker + disease_location_group +
disease_activity + group, family = "gaussian", data = xmodelCD)
Deviance Residuals:
Min 1Q Median 3Q Max
-6.1875 -2.9923 -1.6891 -0.0394 18.0555
Coefficients:
Estimate Std. Error t value Pr(>|t|)
(Intercept) 6.2622 2.6517 2.362 0.0207 *
gendermale 0.8871 1.1412 0.777 0.4393
age_groupA2_17_40 -0.5314 2.1798 -0.244 0.8080
age_groupA3_40 -2.7729 2.3960 -1.157 0.2506
smokerformer -0.2837 1.4175 -0.200 0.8419
smokernever -0.6350 1.3837 -0.459 0.6475
disease_location_groupL2_colon -1.1464 1.6192 -0.708 0.4810
disease_location_groupL3_ileumcolon -0.6781 1.3493 -0.503 0.6166
disease_activitymoderate -1.1081 1.2804 -0.865 0.3894
disease_activitysevere -2.8528 1.8391 -1.551 0.1249
groupresponder -2.0393 1.1823 -1.725 0.0885 .
---
Signif. codes: 0 ‘***’ 0.001 ‘**’ 0.01 ‘*’ 0.05 ‘.’ 0.1 ‘ ’ 1
(Dispersion parameter for gaussian family taken to be 27.07775)
Null deviance: 2373.0 on 89 degrees of freedom
Residual deviance: 2139.1 on 79 degrees of freedom
AIC: 564.56
Number of Fisher Scoring iterations: 2

## Sheet: E_glm_CAIT%_healthy_clinic
Summary of the glm model assessing association between % of CAIT cells in healthy controls and demographic covariates
Call:
glm(formula = log ~ gender + age_group + smoker, family = "gaussian",
data = xmodelH)
Deviance Residuals:
Min 1Q Median 3Q Max
-0.9443 -0.6383 -0.3624 0.6458 2.4231
Coefficients:
Estimate Std. Error t value Pr(>|t|)
(Intercept) -5.24176 0.23317 -22.481 <2e-16 ***
gendermale -0.28213 0.17282 -1.632 0.106
age_groupA3_40 -0.12611 0.18341 -0.688 0.493
smokerformer 0.01237 0.24612 0.050 0.960
smokernever 0.18605 0.22425 0.830 0.409
smokershort_former -0.15212 0.27546 -0.552 0.582
---
Signif. codes: 0 ‘***’ 0.001 ‘**’ 0.01 ‘*’ 0.05 ‘.’ 0.1 ‘ ’ 1
(Dispersion parameter for gaussian family taken to be 0.6932896)
Null deviance: 68.169 on 98 degrees of freedom
Residual deviance: 64.476 on 93 degrees of freedom
AIC: 252.5
Number of Fisher Scoring iterations: 2

## Sheet: F_glm_CAITn_healthy_clinic
Summary of the glm model assessing association between number of CAIT cells in healthy controls and demographic covariates
Call:
glm(formula = percentage ~ gender + age_group + smoker, family = "gaussian",
data = xmodelH)
Deviance Residuals:
Min 1Q Median 3Q Max
-0.9079 -0.7307 -0.4557 0.2200 4.1129
Coefficients:
Estimate Std. Error t value Pr(>|t|)
(Intercept) 0.90790 0.31434 2.888 0.00482 **
gendermale -0.29577 0.23298 -1.270 0.20743
age_groupA3_40 -0.02079 0.24725 -0.084 0.93316
smokerformer -0.15639 0.33179 -0.471 0.63849
smokernever -0.07867 0.30232 -0.260 0.79526
smokershort_former -0.22983 0.37136 -0.619 0.53749
---
Signif. codes: 0 ‘***’ 0.001 ‘**’ 0.01 ‘*’ 0.05 ‘.’ 0.1 ‘ ’ 1
(Dispersion parameter for gaussian family taken to be 1.260005)
Null deviance: 120.00 on 98 degrees of freedom
Residual deviance: 117.18 on 93 degrees of freedom
AIC: 311.64
Number of Fisher Scoring iterations: 2
